# Supplementary material for: Baicalein alleviates non-alcoholic fatty liver disease in mice by ameliorating intestinal barrier dysfunction
Source: Royal Society of Chemistry journal article supplement (doi:10.1039/d2fo03015b), 2023-01-01
Supplement: d2fo03015b1.pdf [file d2fo03015b1.pdf]

## PPAR $\alpha$

Normal Control  
MCD-only  
Baicalein (200 mg/kg)-MCD  
Baicalein (400 mg/kg)-MCD

1.

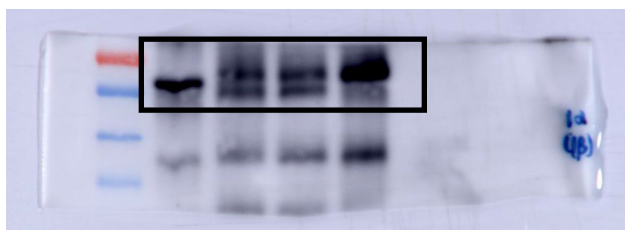

PPAR $\alpha$

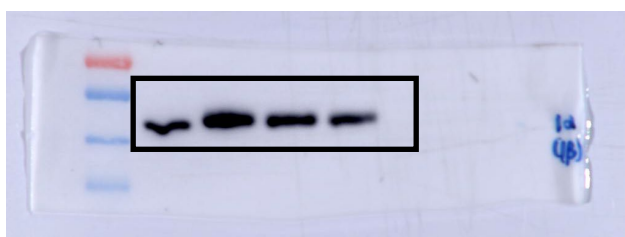

$\beta$ -actin

2.

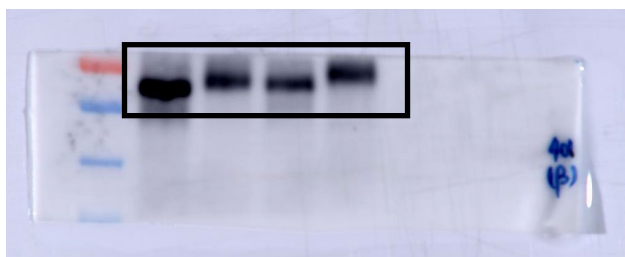

PPAR $\alpha$

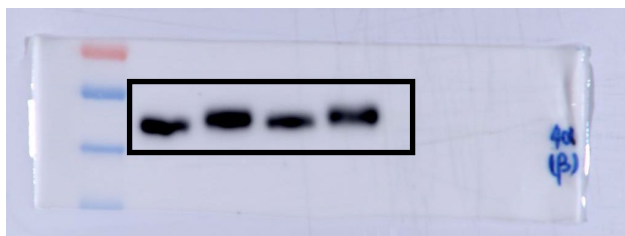

$\beta$ -actin

3.

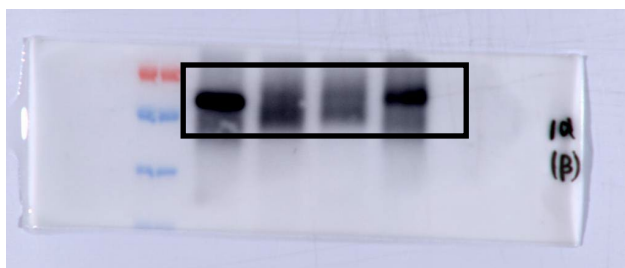

PPAR $\alpha$

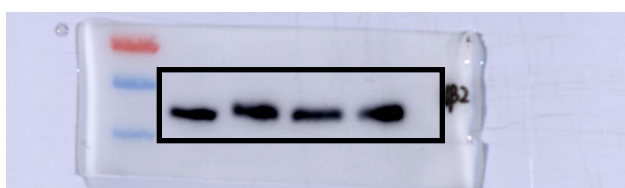

$\beta$ -actin

# TLR4

Normal Control  
MCD-only  
Baicalein (200 mg/kg)-MCD  
Baicalein (400 mg/kg)-MCD

1.

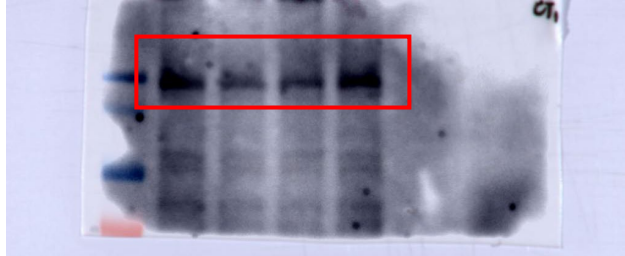

TLR4

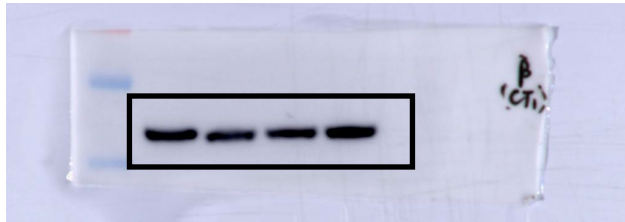

$\beta$ -actin

2.

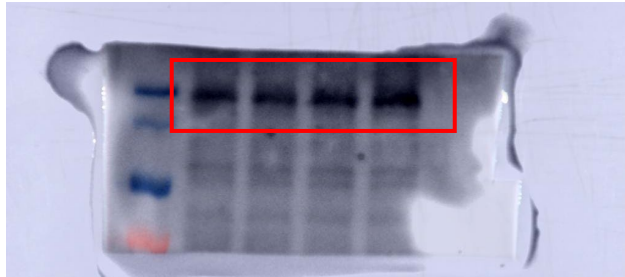

TLR4

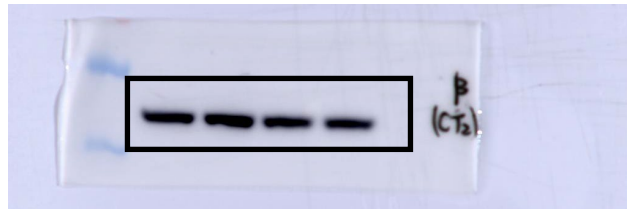

$\beta$ -actin

3.

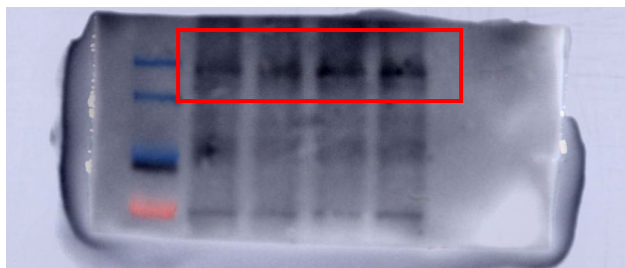

TLR4

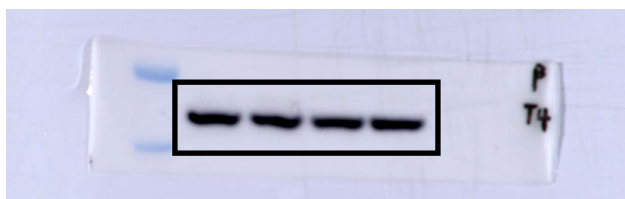

$\beta$ -actin

**I $\kappa$ B- $\alpha$**

Normal Control  
MCD-only  
Baicalein (200 mg/kg)-MCD  
Baicalein (400 mg/kg)-MCD

1.

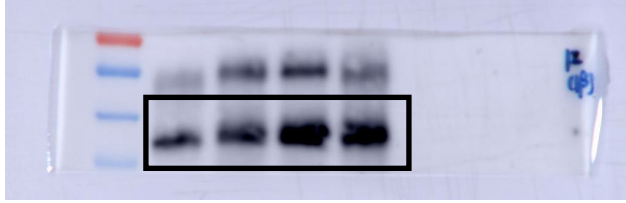

I $\kappa$ B- $\alpha$

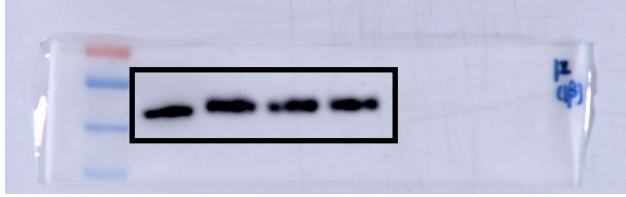

$\beta$ -actin

2.

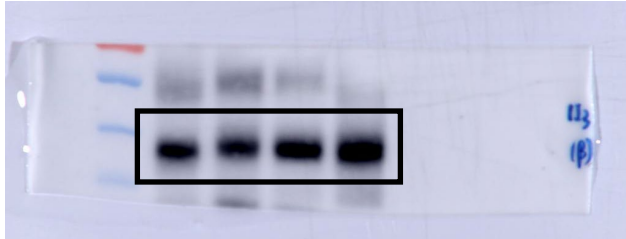

I $\kappa$ B- $\alpha$

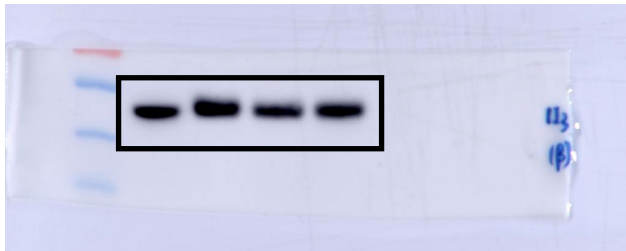

$\beta$ -actin

3.

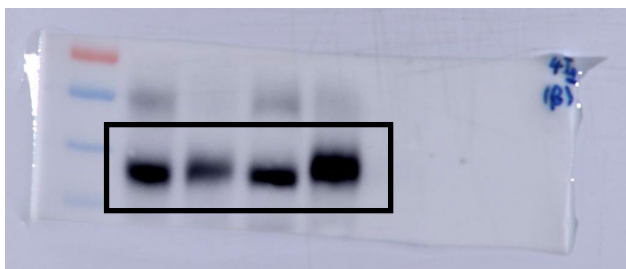

I $\kappa$ B- $\alpha$

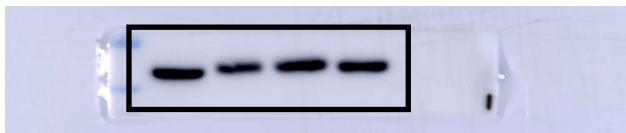

$\beta$ -actin

## NF-κB p65

Normal Control  
MCD-only  
Baicalein (200 mg/kg)-MCD  
Baicalein (400 mg/kg)-MCD

1.

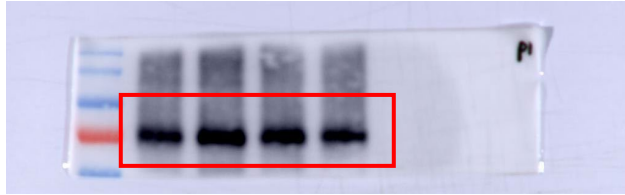

NF-κB p65

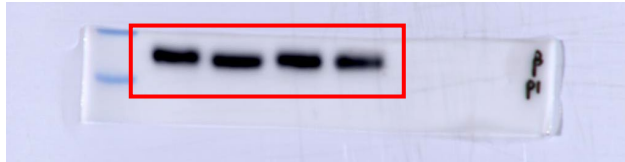

β-actin

2.

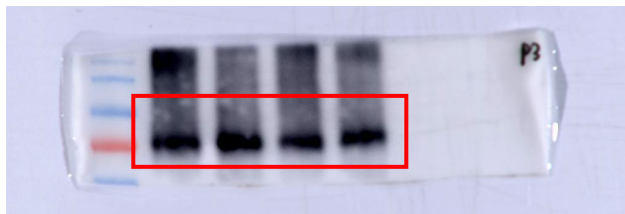

NF-κB p65

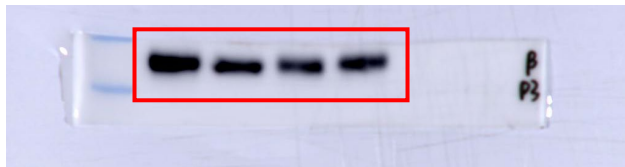

β-actin

3.

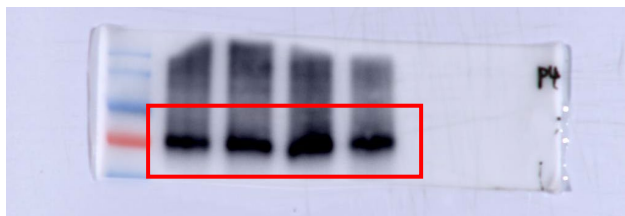

NF-κB p65

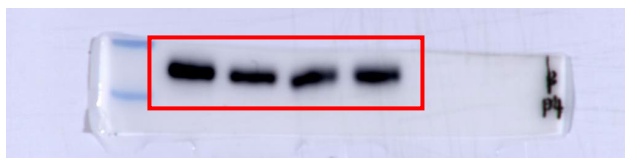

β-actin

## p-NF-κB p65

1.

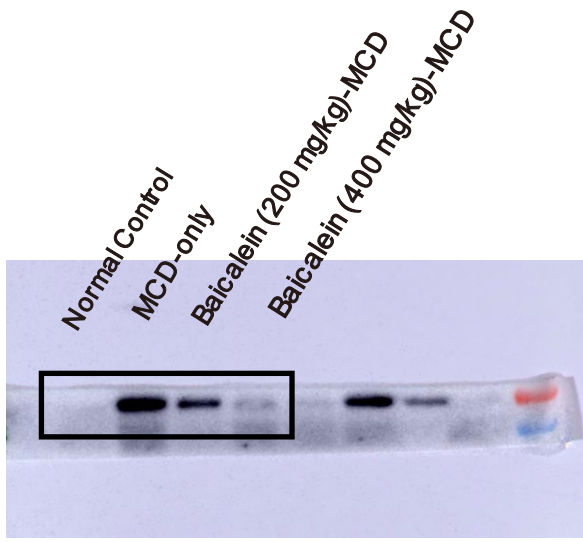

p-NF-κB p65

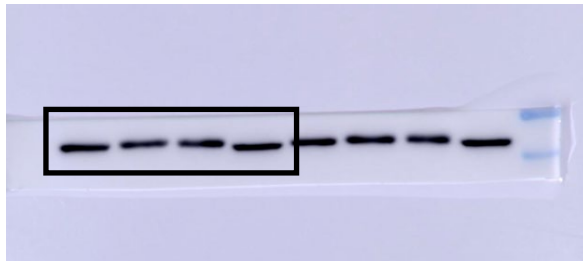

β-actin

2.

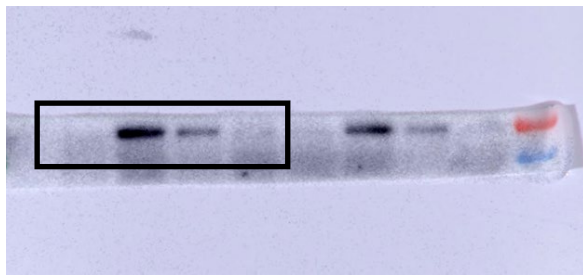

p-NF-κB p65

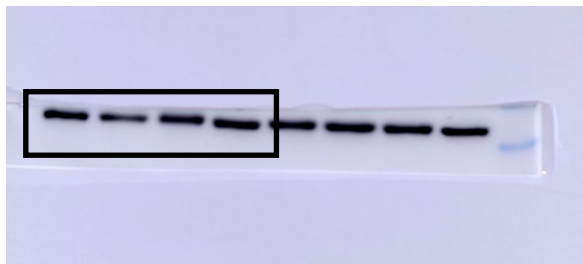

β-actin

3.

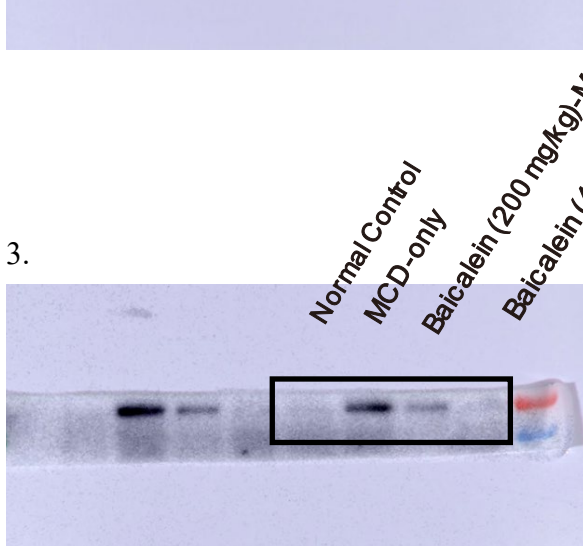

p-NF-κB p65

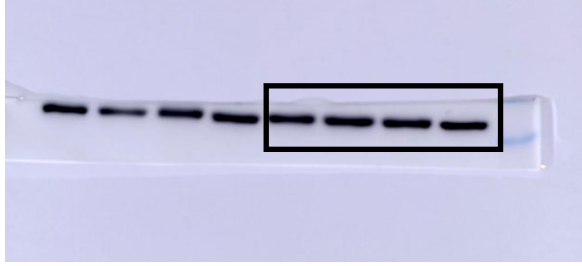

$\beta$ -actin
